# Supplementary material for: Absence of Alpha-tACS Aftereffects in Darkness Reveals Importance of Taking Derivations of Stimulation Frequency and Individual Alpha Variability Into Account
Source: PubMed Central journal article supplement (PMC6019480; doi:10.3389/fpsyg.2018.00984), 2018-06-20
Supplement: Image_1.pdf [file Image_1.pdf]

## *Supplementary Material*

# **Absence of alpha-tACS aftereffects in darkness reveals importance of taking derivations of stimulation frequency and individual alpha variability into account**

**Heiko I. Stecher<sup>1</sup>, Christoph S. Herrmann<sup>1,2\*</sup>**

<sup>1</sup> Experimental Psychology Lab, Department of Psychology, European Medical School, Cluster for excellence “Hearing for all”, Carl von Ossietzky University, Oldenburg, Germany

<sup>2</sup> Research Center Neurosensory Science, Carl von Ossietzky University, Oldenburg, Germany

**\* Correspondence:**

Prof. Dr. Christoph S. Herrmann

Experimental Psychology Lab,

Carl-von-Ossietzky-Universität Oldenburg,

Ammerländer Heerstraße 114-118,

2611 Oldenburg, Germany

Tel.: +49 441 798 4936

Fax: +49 441 798 3865

Email: [christoph.herrmann@uni-oldenburg.de](mailto:christoph.herrmann@uni-oldenburg.de)

## 1 Supplementary Figures

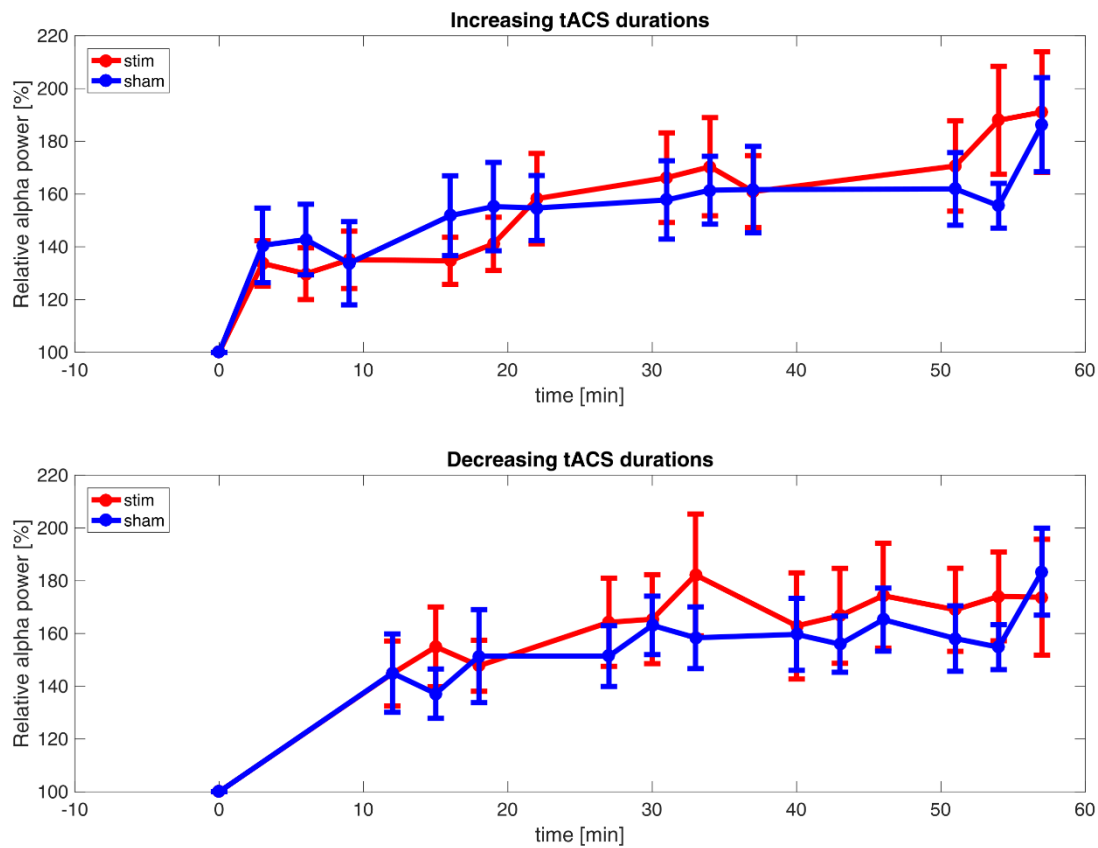

**Supplementary Figure 1.** Relative parietal  $\alpha$ -power post stimulation

(A) Time-course of  $\alpha$ -power relative to baseline, comparing increasing-sequence stimulation group (red) and sham (blue). Each point represents the average power of a 3-min observation window. Error bars depict the standard error of the mean. (B) Time-course of  $\alpha$ -power relative to baseline, comparing decreasing-sequence stimulation group (red) and sham (blue): Each point represents the average power of a 3-min observation window. Error bars depict standard error of the mean.

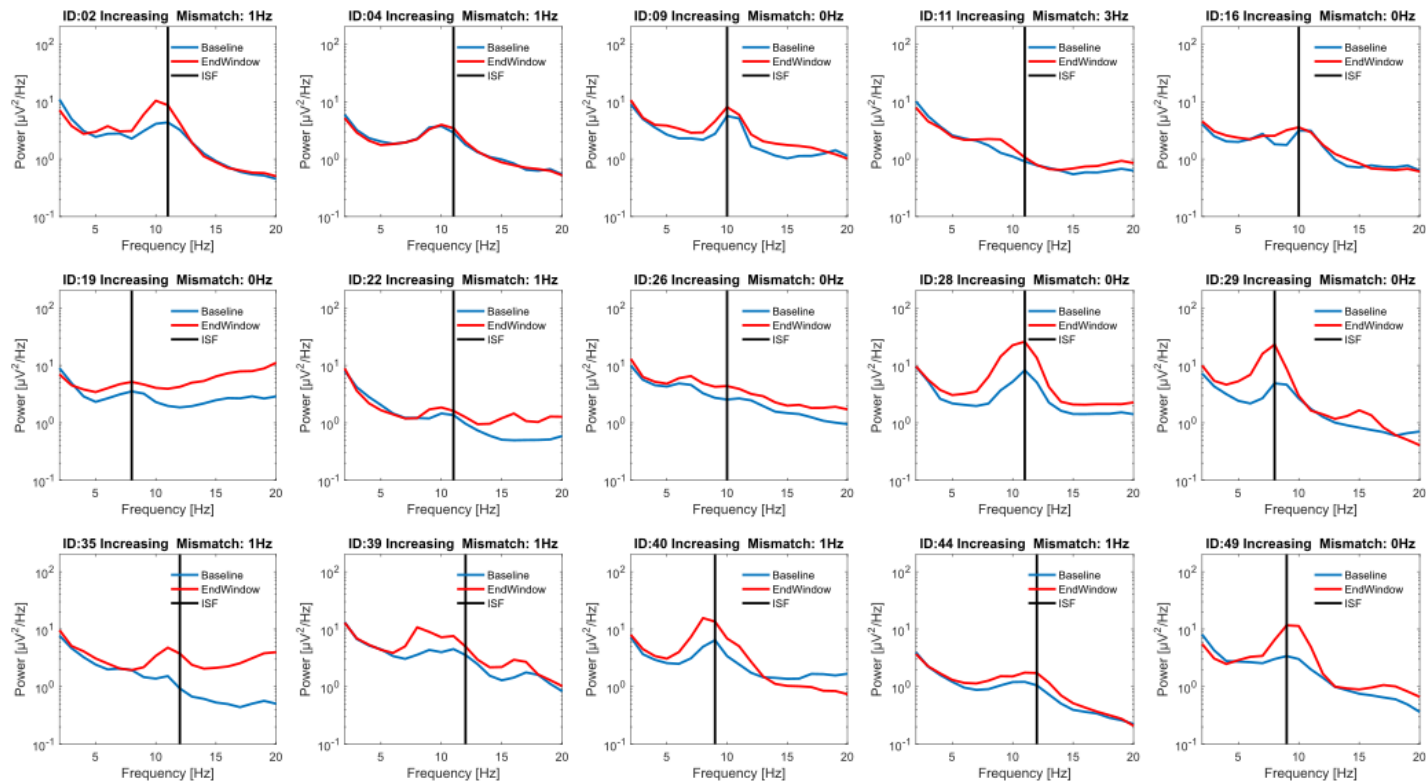

**Supplementary Figure 2.** Posterior power spectra of all participants of the increasing-stimulation group are shown. The blue lines depict the power in the 3 min baseline before the first stimulation block, the red line depicts the power spectra in the last 9 min of the experiment. The black line marks the Individual stimulation frequency, that was determined before the start of the experiment from a raw 3 min recording of Pz. The mismatch between the IAF peak of the last 9 mine recording and the ISF is given in each subtitle.

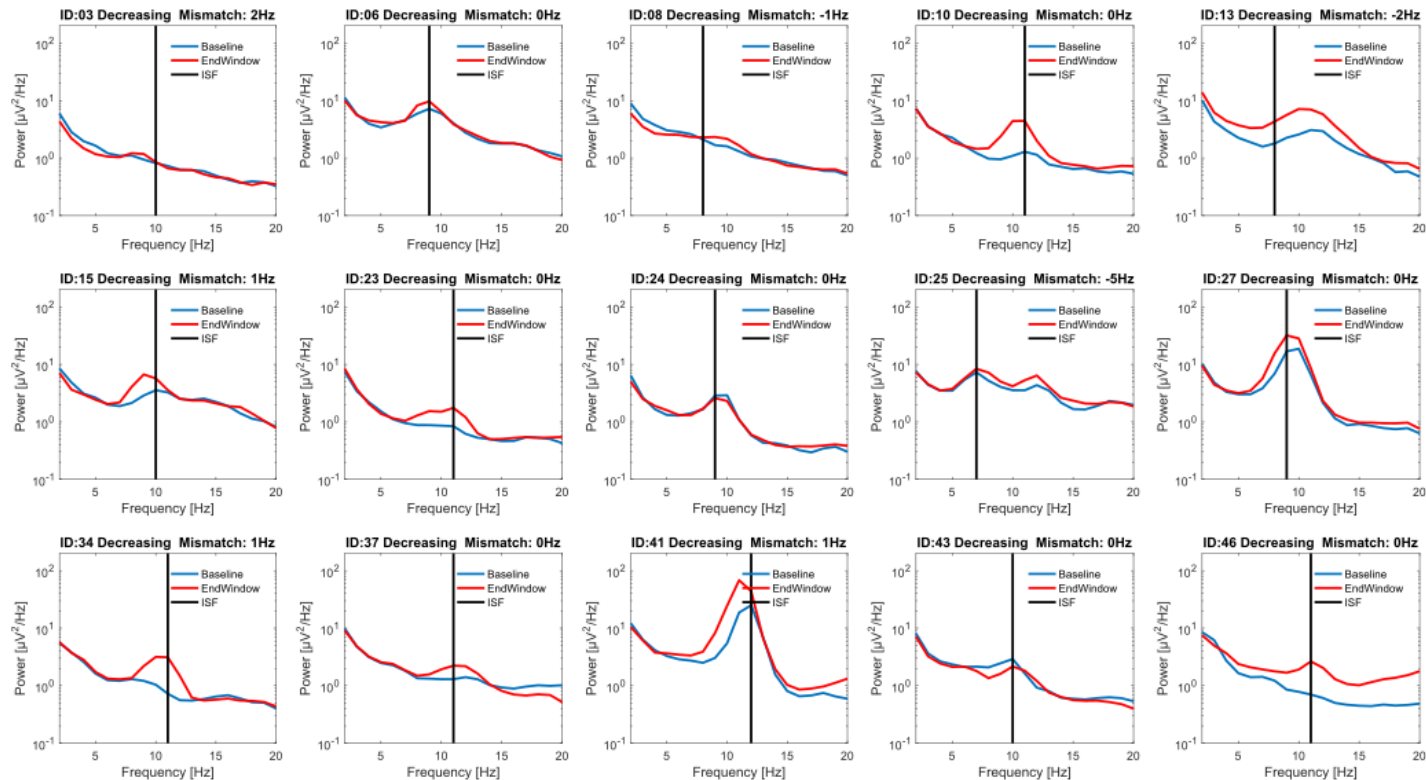

**Supplementary Figure 3.** Posterior power spectra of all participants of the decreasing-stimulation group are shown. The blue lines depict the power in the 3 min baseline before the first stimulation block, the red line depicts the power spectra in the last 9 min of the experiment. The black line marks the Individual stimulation frequency, that was determined before the start of the experiment from a raw 3 min recording of Pz. The mismatch between the IAF peak of the last 9 mine recording and the ISF is given in each subtitle.

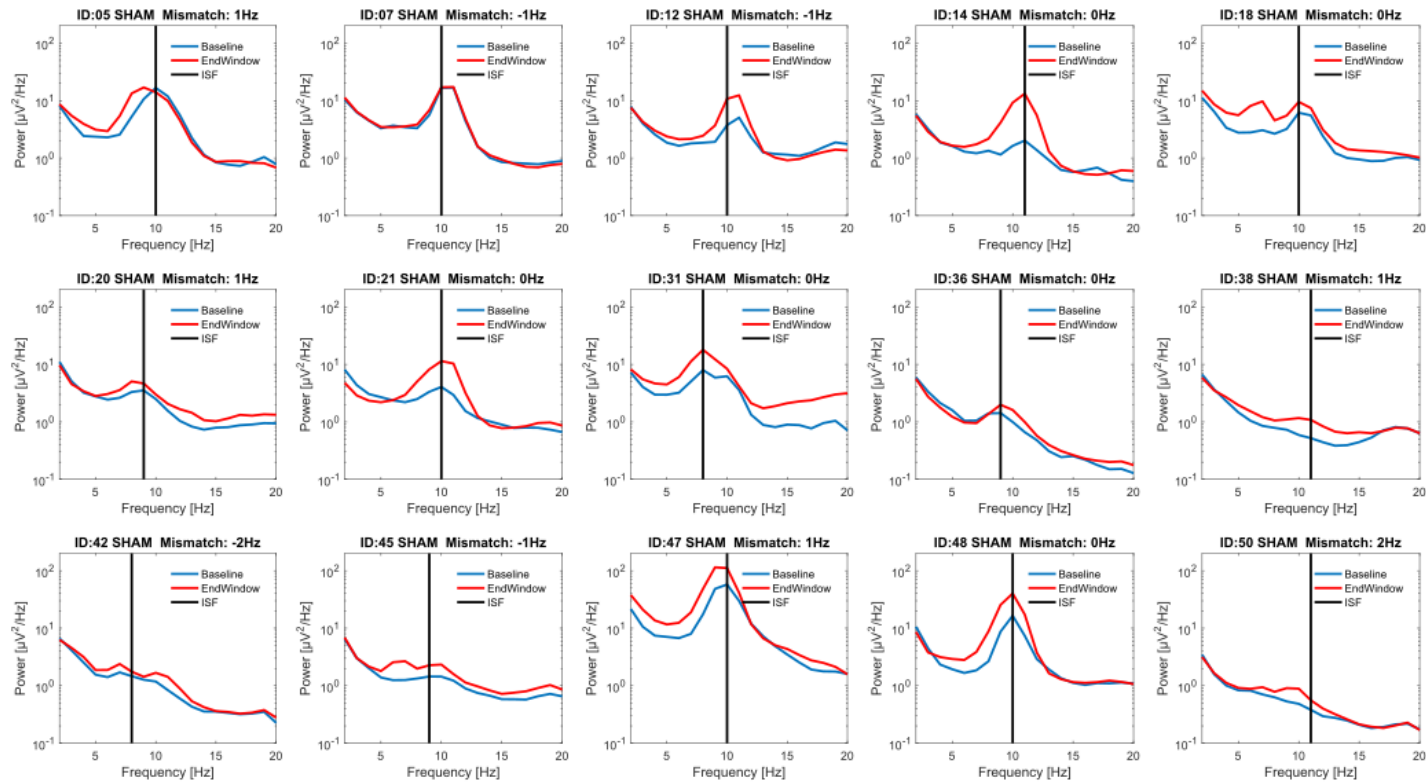

**Supplementary Figure 4.** Posterior power spectra of all participants of the sham-stimulation group are shown. The blue lines depict the power in the 3 min baseline before the first stimulation block, the red line depicts the power spectra in the last 9 min of the experiment. The black line marks the Individual stimulation frequency, that was determined before the start of the experiment from a raw 3 min recording of Pz. The mismatch between the IAF peak of the last 9 mine recording and the ISF is given in each subtitle.
